# Supplementary material
Source: Springer Nature journal article supplement (https://www.springermedizin.de/resource/supplementary/12991_2009_998_MOESM3_ESM.pdf/9615540)
Supplement: MOESM3 [file 9615540]

**Schizotropic Vulnerability**

*(trait-like anhedonia)*

(i.e. schizotypal personality)

Psychosocial  
Stressors

**Coping strategies**

*(trait-like anhedonia,*  
not directly linked to a  
schizotypal personality)

Prodromal or early  
symptoms  
*(State-like anhedonia)*

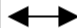

Overt Schizophrenia  
(negative, deficit or  
hebephrenic  
syndromes)
